# Supplementary material for: GLP-1 Receptor Agonist Discontinuation Among Patients With Obesity and/or Type 2 Diabetes
Source: PubMed Central journal article supplement — JAMA Netw Open. 2024 May 24;7(5):e2413172. doi: 10.1001/jamanetworkopen.2024.13172 (PMC11127113; doi:10.1001/jamanetworkopen.2024.13172), 2024-05-24
Supplement: jamanetwopen-e2413172-s002.pdf [file jamanetwopen-e2413172-s002.pdf]

## Data Sharing Statement

Do. GLP-1 Receptor Agonist Discontinuation Among Patients With Obesity and/or Type 2 Diabetes. *JAMA Netw Open*. Published May 24, 2024.

doi:10.1001/jamanetworkopen.2024.13172

### Data

**Data available:** No

### Additional Information

**Explanation for why data not available:** We cannot provide individual patient data even though it is deidentified. We can provide a data dictionary.
